# Supplementary material for: Liposome production by microfluidics: potential and limiting factors
Source: PubMed Central journal article supplement (PMC4872163; doi:10.1038/srep25876), 2016-05-19
Supplement: srep25876-s1.pdf [file srep25876-s1.pdf]

## Supplementary Information for:

### **Liposome production by microfluidics: potential and limiting factors**

Dario Carugo<sup>1,2</sup>, Elisabetta Bottaro<sup>3</sup>, Joshua Owen<sup>1</sup>, Eleanor Stride<sup>1</sup> and Claudio Nastruzzi\*<sup>3</sup>

<sup>1</sup>Institute of Biomedical Engineering, Department of Engineering Science, Old Road Campus Research Building, University of Oxford, Oxford, United Kingdom

<sup>2</sup>Faculty of Engineering and the Environment, University of Southampton, Southampton, UK

<sup>3</sup>Department of Life Science and Biotechnology, University of Ferrara, Italy

\*Correspondence to:  
Prof Claudio Nastruzzi, PhD  
Department of Life Sciences and Biotechnology  
University of Ferrara  
via Fossato di Mortara 17, 44121, Ferrara, Italy  
Phone: +39-0532-455348  
e-mail: nas@unife.it  
Web: [www.biomaterials.it](http://www.biomaterials.it)

**Table S1 | Medicinal products containing liposomes (currently on the market)**

| product name/<br>drug/<br>formulation                                          | composition                                                                                                                   | lipid composition (mg/ml)                                                                                 |                                                                                                      | diluent                                                                               | route of injection                  |
|--------------------------------------------------------------------------------|-------------------------------------------------------------------------------------------------------------------------------|-----------------------------------------------------------------------------------------------------------|------------------------------------------------------------------------------------------------------|---------------------------------------------------------------------------------------|-------------------------------------|
| <b>Abelcet</b><br>Amphotericin B<br>Suspension                                 | <i>Lipids</i><br>DMPC, DMPG<br><i>Other excipients</i><br>Sodium Chloride                                                     | <i>Starting</i><br>DMPC 5.01<br>DMPG 2.14<br>Tot=7.15                                                     | <i>Ending</i><br>DMPC 3.4<br>DMPG 1.5<br>Tot=4.9                                                     | After mix withdraw the<br>correctly dose and<br>dilute to 1 mg/ml with<br>dextrose 5% | Intravenous                         |
| <b>Ambisome</b><br><b>Amphocil</b><br>Amphotericin B<br>Powder                 | <i>Lipids</i><br>HSPC,DSPG, chol, $\alpha$ -Toc, DSH<br><i>Other excipients</i><br>Sucrose, disodium succinate<br>hexahydrate | <i>Starting</i><br>HSPC 23.35<br>Chol 11.19<br>DSPG 8.98<br>$\alpha$ -Toc 0.124<br>DSH 13.88<br>Tot=57.52 | <i>Ending</i><br>HSPC 5.83<br>Chol 2.79<br>DSPG 2.25<br>$\alpha$ -Toc 0.031<br>DSH 3.47<br>Tot=14.37 | Dilute it in dextrose 5 %                                                             | Intravenous                         |
| <b>Curosurf</b><br>Phospholipid<br>fraction from<br>porcine lung<br>suspension | <i>Lipids</i><br>Phospholipid fraction from<br>porcine lung                                                                   | Phospholipid fraction<br>from porcine lung 80<br>Tot=80                                                   |                                                                                                      | No dilution needed                                                                    | Intratracheal or<br>intra bronchial |
| <b>DaunoXome</b><br>Daunorubicin<br>Emulsion                                   | <i>Lipids</i><br>DSPC, chol,<br><i>Other excipients</i><br>Sucrose, glycine, calcium chloride                                 | <i>Starting</i><br>DSPC 28.16<br>chol 6.72<br>Tot=34.80                                                   | <i>Ending</i><br>DSPC 14.08<br>Chol 3.36<br>Tot=17.44                                                | Diluted 1:1 with 5%<br>dextrose                                                       | Intravenous                         |

|                                                                                                           |                                                                                                                                             |                                                                                 |                                                                           |                                                                                            |               |
|-----------------------------------------------------------------------------------------------------------|---------------------------------------------------------------------------------------------------------------------------------------------|---------------------------------------------------------------------------------|---------------------------------------------------------------------------|--------------------------------------------------------------------------------------------|---------------|
| <b>Depocyt</b><br>Cytarabine<br>Suspension                                                                | <i>Lipids</i><br>DOPC, triolein, DPPG<br><i>Other excipients</i><br>Sodium chloride                                                         | DOPC 5.7<br>Chol 4.4<br>Triolein 1.2<br>DPPG 1<br>Tot=12.30                     |                                                                           | No dilution needed                                                                         | Intravenous   |
| <b>DepoDur</b><br>Morphine sulfate<br>Suspension                                                          | <i>Lipids</i><br>HSPC,DSPG,DOPG, chol,<br>tricaprylin, triolein                                                                             | Chol 3.3<br>Triolein 0.1<br>DOPC 4.2<br>DPPG 0.9<br>Tricaprylin 0.3<br>Tot=8.80 |                                                                           | No dilution needed                                                                         | Epidural      |
| <b>Doxil<br/>Lipo-dox Caelyx</b><br>Doxorubicin<br>Suspension                                             | <i>Lipids</i><br>HSPC,DSPG, chol, MPEG–DSPE<br><i>Other excipients</i><br>Ammonium sulfate, sucrose,<br>histidine                           | <i>Starting</i><br>HSPC 9.58<br>Chol 3.19<br>MPEG–DSPE 3.19<br>Tot=15.96        | <i>Ending</i><br>HSPC 1.72<br>Chol 0.57<br>MPEG–<br>DSPE 0.57<br>Tot=2.86 | Diluted in 250 ml of 5%<br>dextrose                                                        | Intravenous   |
| <b>Epaxal</b><br>Inactivated<br>hepatitis A virus<br>(strain RG-SB)<br>Suspension                         | <i>Lipids</i><br><i>Lecithin, cephalin</i><br><i>Other excipients</i><br>Sodium chloride                                                    | Lecithin 0.08<br>Cephalin 0.02<br>Tot=0.10                                      |                                                                           | No dilution needed                                                                         | Intramuscular |
| <b>Inflexal V</b><br>Inactivated<br>hemagglutinine of<br>Influenza virus<br>strains A and B<br>Suspension | <i>Lipids</i><br>Lecithin<br><i>Other excipients</i><br>Sodium chloride, disodium<br>phosphate dehydrate, potassium<br>dihydrogen phosphate | Lecithin 0.234<br>Tot=0.234                                                     |                                                                           | No dilution needed                                                                         | Intramuscular |
| <b>Marqibo</b><br>Vincristine sulfate<br>suspension                                                       | <i>Lipids</i><br>Sphingomyelin, chol<br><i>Other excipients</i><br>Mannitol, sodium citrate, sodium<br>phosphate, sodium chloride           | Sphingomyelin 73.5<br>Chol 29.5<br>Tot=103.0                                    |                                                                           | The final drug product is<br>prepared on site from<br>the components in the<br>Marqibo Kit | Intravenous   |

|                                          |                                                                                                               |                                    |                                                                                                                                |             |
|------------------------------------------|---------------------------------------------------------------------------------------------------------------|------------------------------------|--------------------------------------------------------------------------------------------------------------------------------|-------------|
| <b>Myocet</b><br>Doxorubicin<br>Powder   | <i>Lipids</i><br>EPC, chol<br><i>Other excipients</i><br>Citric acid, sodium hydroxide                        | EPC<br>Chol<br>(55:45 molar ratio) | Withdraw 20 ml sodium chloride solution for injection (0.9%), and inject into Myocet doxorubicin HCl, intended for preparation | Intravenous |
| <b>Visudyne</b><br>Verteporfin<br>Powder | <i>Lipids</i><br>HSPC,DSPG, chol<br>ascorbyl palmitate<br><i>Other excipients</i><br>Butylated hydroxytoluene | EPC<br>DMPC<br>(3:5 molar ratio)   | Reconstitute Visudyne with 7.0 ml water for injections to produce 7.5 ml of a 2.0 mg/ml solution                               | Intravenous |

Abbreviation: **HSPC = hydrogenated soy phosphatidylcholine; DSPG = distearoylphosphatidyl glycerol; chol = cholesterol; α-Toc = alpha-tocopherol; DSH = disodium succinate hexahydrate; DMPC = dimyristoylphosphatidylcholine; DMPG = dimyristoylphosphatidylglycerol; DSPC = distearoylphosphatidylcholine ; MPEG-DSPE = N-(carbonyl-methoxypolyethylene glycol 2000)-1,2-distearoyl-sn-glycero-3-phospho-ethanolamine sodium salt ;EPC = egg phosphatidylcholine; DOPC= dioleoylphosphatidylcholine; DPPG = dipalmytoilphosphatidylglycerol; DOPG = dioleoylphosphatidylcholine**

Date were obtained from the information leaflets included into the packaging of the reported medicines. Leaflets can be consulted at the following websites.

Abelcet: [www.medicines.org.uk/emc/PIL.28850.latest.pdf](http://www.medicines.org.uk/emc/PIL.28850.latest.pdf)

Ambisome: [www.medicines.org.uk/emc/PIL.8363.latest.pdf](http://www.medicines.org.uk/emc/PIL.8363.latest.pdf)

Amphocil: [www.infarmed.pt/infomed/download\\_ficheiro.php?med\\_id=360&tipo\\_doc=fi](http://www.infarmed.pt/infomed/download_ficheiro.php?med_id=360&tipo_doc=fi)

Curosurf: [www.medicines.org.uk/emc/PIL.21480.latest.pdf](http://www.medicines.org.uk/emc/PIL.21480.latest.pdf)

DaunoXome: [www.medicines.org.uk/emc/PIL.25594.latest.pdf](http://www.medicines.org.uk/emc/PIL.25594.latest.pdf)

Depocyt: [www.medicines.org.uk/emc/PIL.15024.latest.pdf](http://www.medicines.org.uk/emc/PIL.15024.latest.pdf)

DepoDur: [www.mhra.gov.uk/home/groups/spcpil/documents/spcpil/con1428643391518.pdf](http://www.mhra.gov.uk/home/groups/spcpil/documents/spcpil/con1428643391518.pdf)

Doxil: [www.doxil.com/shared/product/doxil/doxil-prescribing-information.pdf](http://www.doxil.com/shared/product/doxil/doxil-prescribing-information.pdf)

Lipo-dox Caelyx: [www.janssen.com/canada/sites/www\\_janssen\\_com\\_canada/files/product/pdf/cae10102013cpm\\_nc.pdf](http://www.janssen.com/canada/sites/www_janssen_com_canada/files/product/pdf/cae10102013cpm_nc.pdf)

Epaxal: [www.medicines.org.uk/emc/PIL.26278.latest.pdf](http://www.medicines.org.uk/emc/PIL.26278.latest.pdf)

Inflexal V: [www.medicines.org.uk/emc/PIL.24908.latest.pdf?isAttachment=true&documentid=24908](http://www.medicines.org.uk/emc/PIL.24908.latest.pdf?isAttachment=true&documentid=24908)

Marqibo: [www.accessdata.fda.gov/drugsatfda\\_docs/label/2012/202497s000lbl.pdf](http://www.accessdata.fda.gov/drugsatfda_docs/label/2012/202497s000lbl.pdf)

Myocet: [www.tevauk.com/mediafile/id/20670.pdf](http://www.tevauk.com/mediafile/id/20670.pdf)

Visudyne: [www.medicines.org.uk/emc/PIL.4647.latest.pdf](http://www.medicines.org.uk/emc/PIL.4647.latest.pdf)

**Table S2 | Volumetric ratio and relative volumes for water, ethanol and lipid solution in ethanol employed in the bulk, controlled ethanol injection experiments.**

| Variation    | Vr = 10 |     |      | Vr = 20 |     |      | Vr = 30 |     |      | Vr = 40 |     |      | Vr = 50 |     |      |
|--------------|---------|-----|------|---------|-----|------|---------|-----|------|---------|-----|------|---------|-----|------|
|              | L       | Et  | W    | L       | Et  | W    | L       | Et  | W    | L       | Et  | W    | L       | Et  | W    |
| Lipids       | 455     | -   | 4545 | 238     | 217 | 4545 | 162     | 293 | 4545 | 122     | 333 | 4545 | 98      | 357 | 4545 |
| Et           | 98      | 357 | 4545 | 98      | 140 | 4762 | 98      | 64  | 4838 | 98      | 24  | 4878 | 98      | -   | 4545 |
| Lipids<br>Et | 455     | -   | 4545 | 238     | -   | 4762 | 162     | -   | 4838 | 122     | -   | 4878 | 98      | -   | 4902 |

**Abbreviation: Vr = volumetric ratio between water and the ethanolic lipid solution; L = lipid solution; Et= ethanol; W = water. Volumes are expressed in microliters.**
